# Supplementary material
Source: publisher figshare collection journal article supplement (https://tandf.figshare.com/articles/dataset/_/5625097)

Figure S3

A

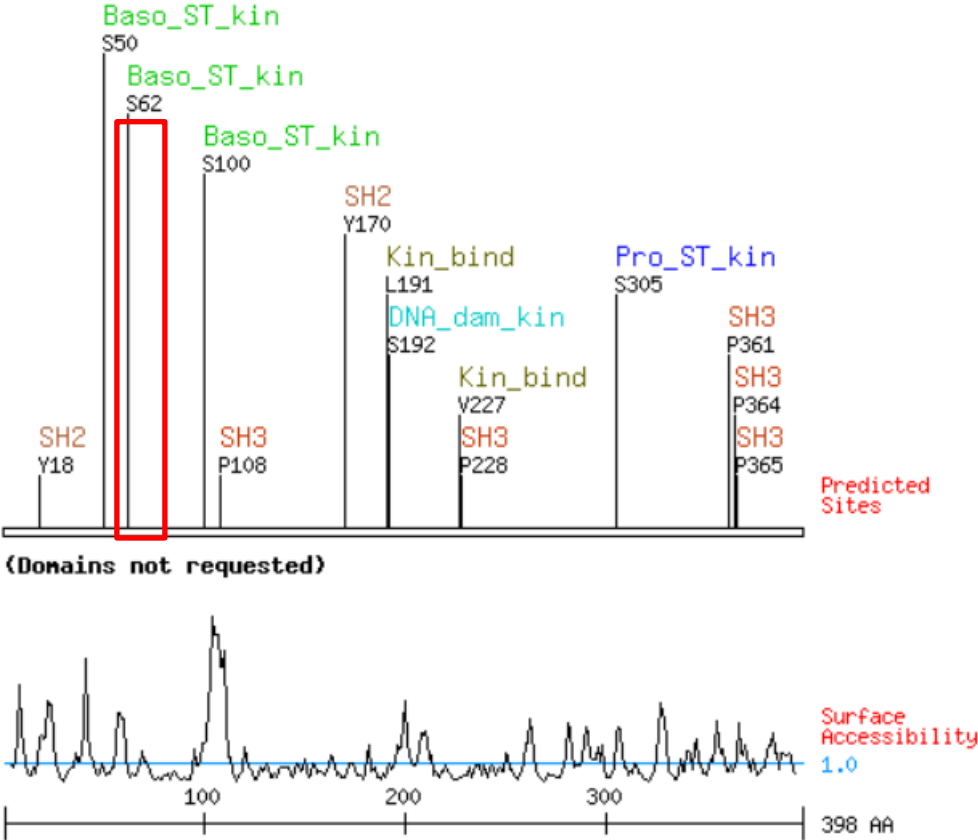

Basophilic serine/threonine kinase group (Baso\_ST\_kin)

Protein Kinase A

Gene Card [PRKACG](#)

| Site | Score                  | Percentile | Sequence                        | SA    |
|------|------------------------|------------|---------------------------------|-------|
| S62  | <a href="#">0.3883</a> | 0.360 %    | <a href="#">FTYRRKFSPIGGTGP</a> | 0.570 |

B

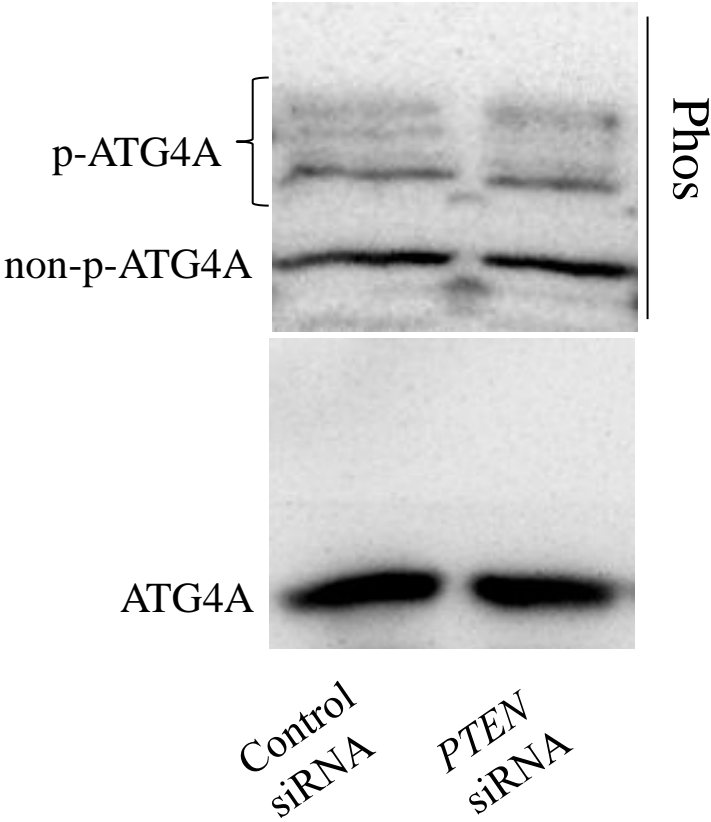

Supplement: Supplementary file 1 [file 2]
