# Supplementary material
Source: publisher figshare collection journal article supplement (https://tandf.figshare.com/articles/dataset/_/5625097)

Figure S1

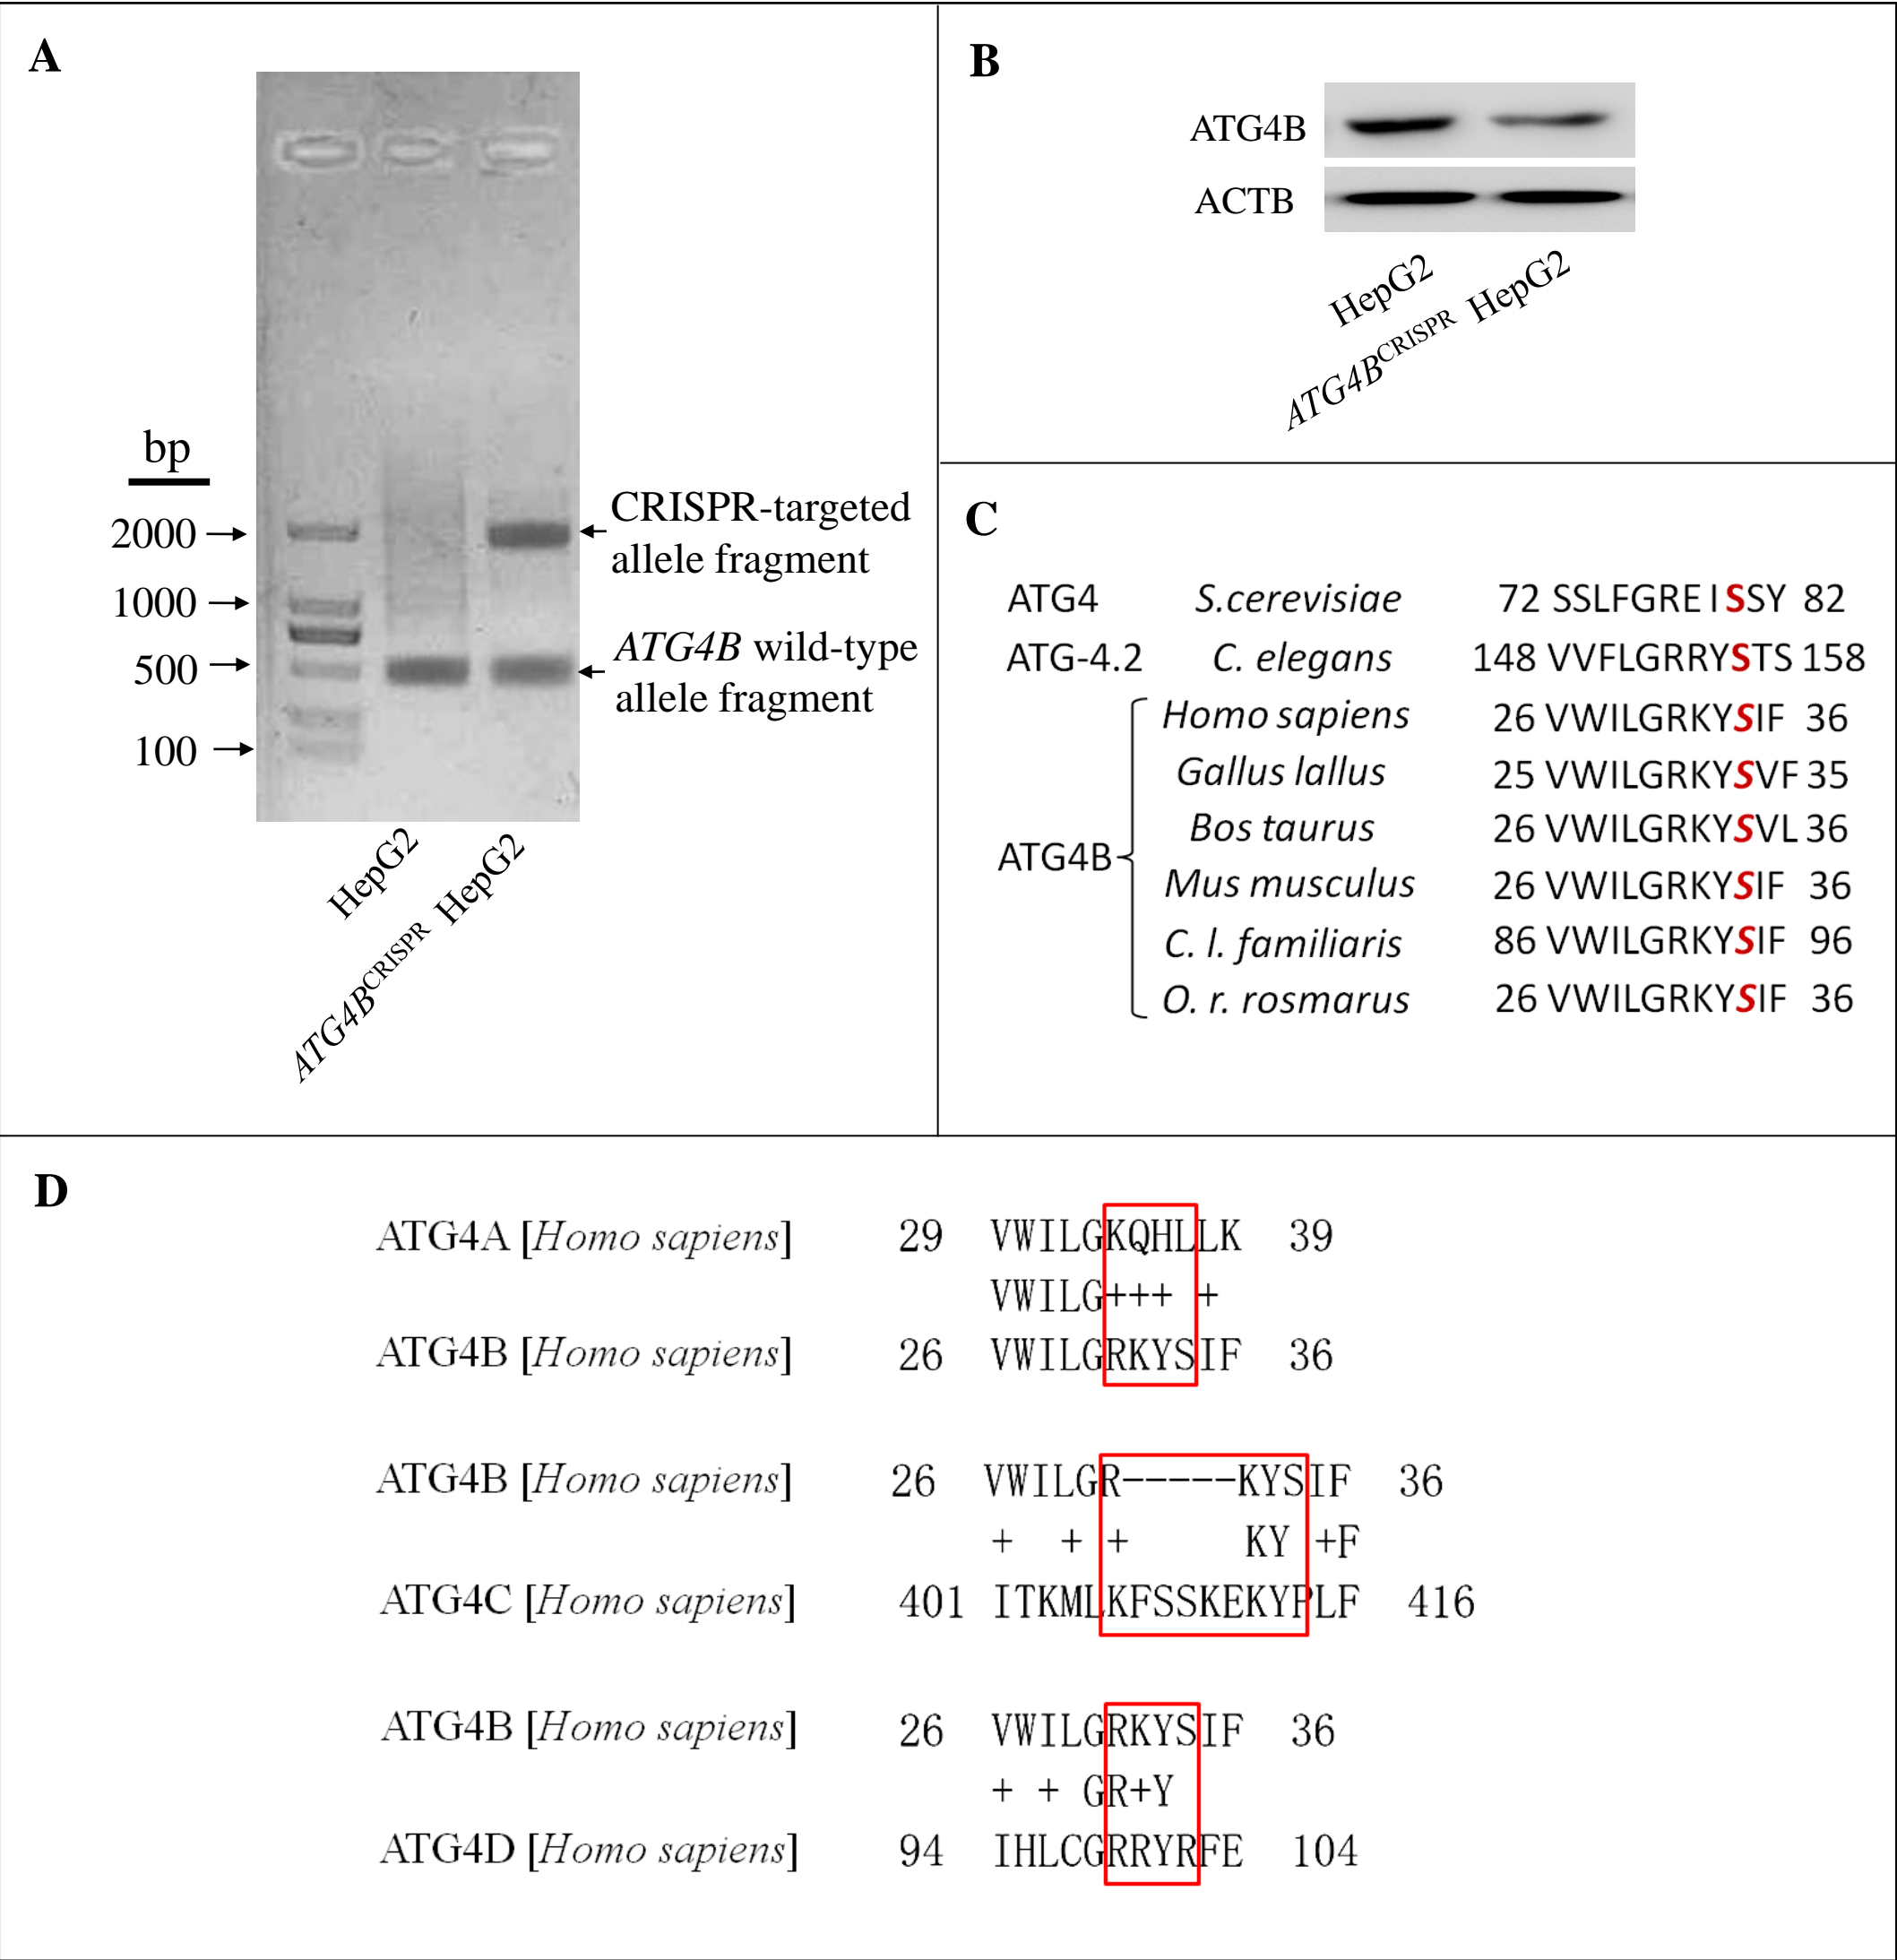

Supplement: Supplementary file 2 [file 2]

Figure S2

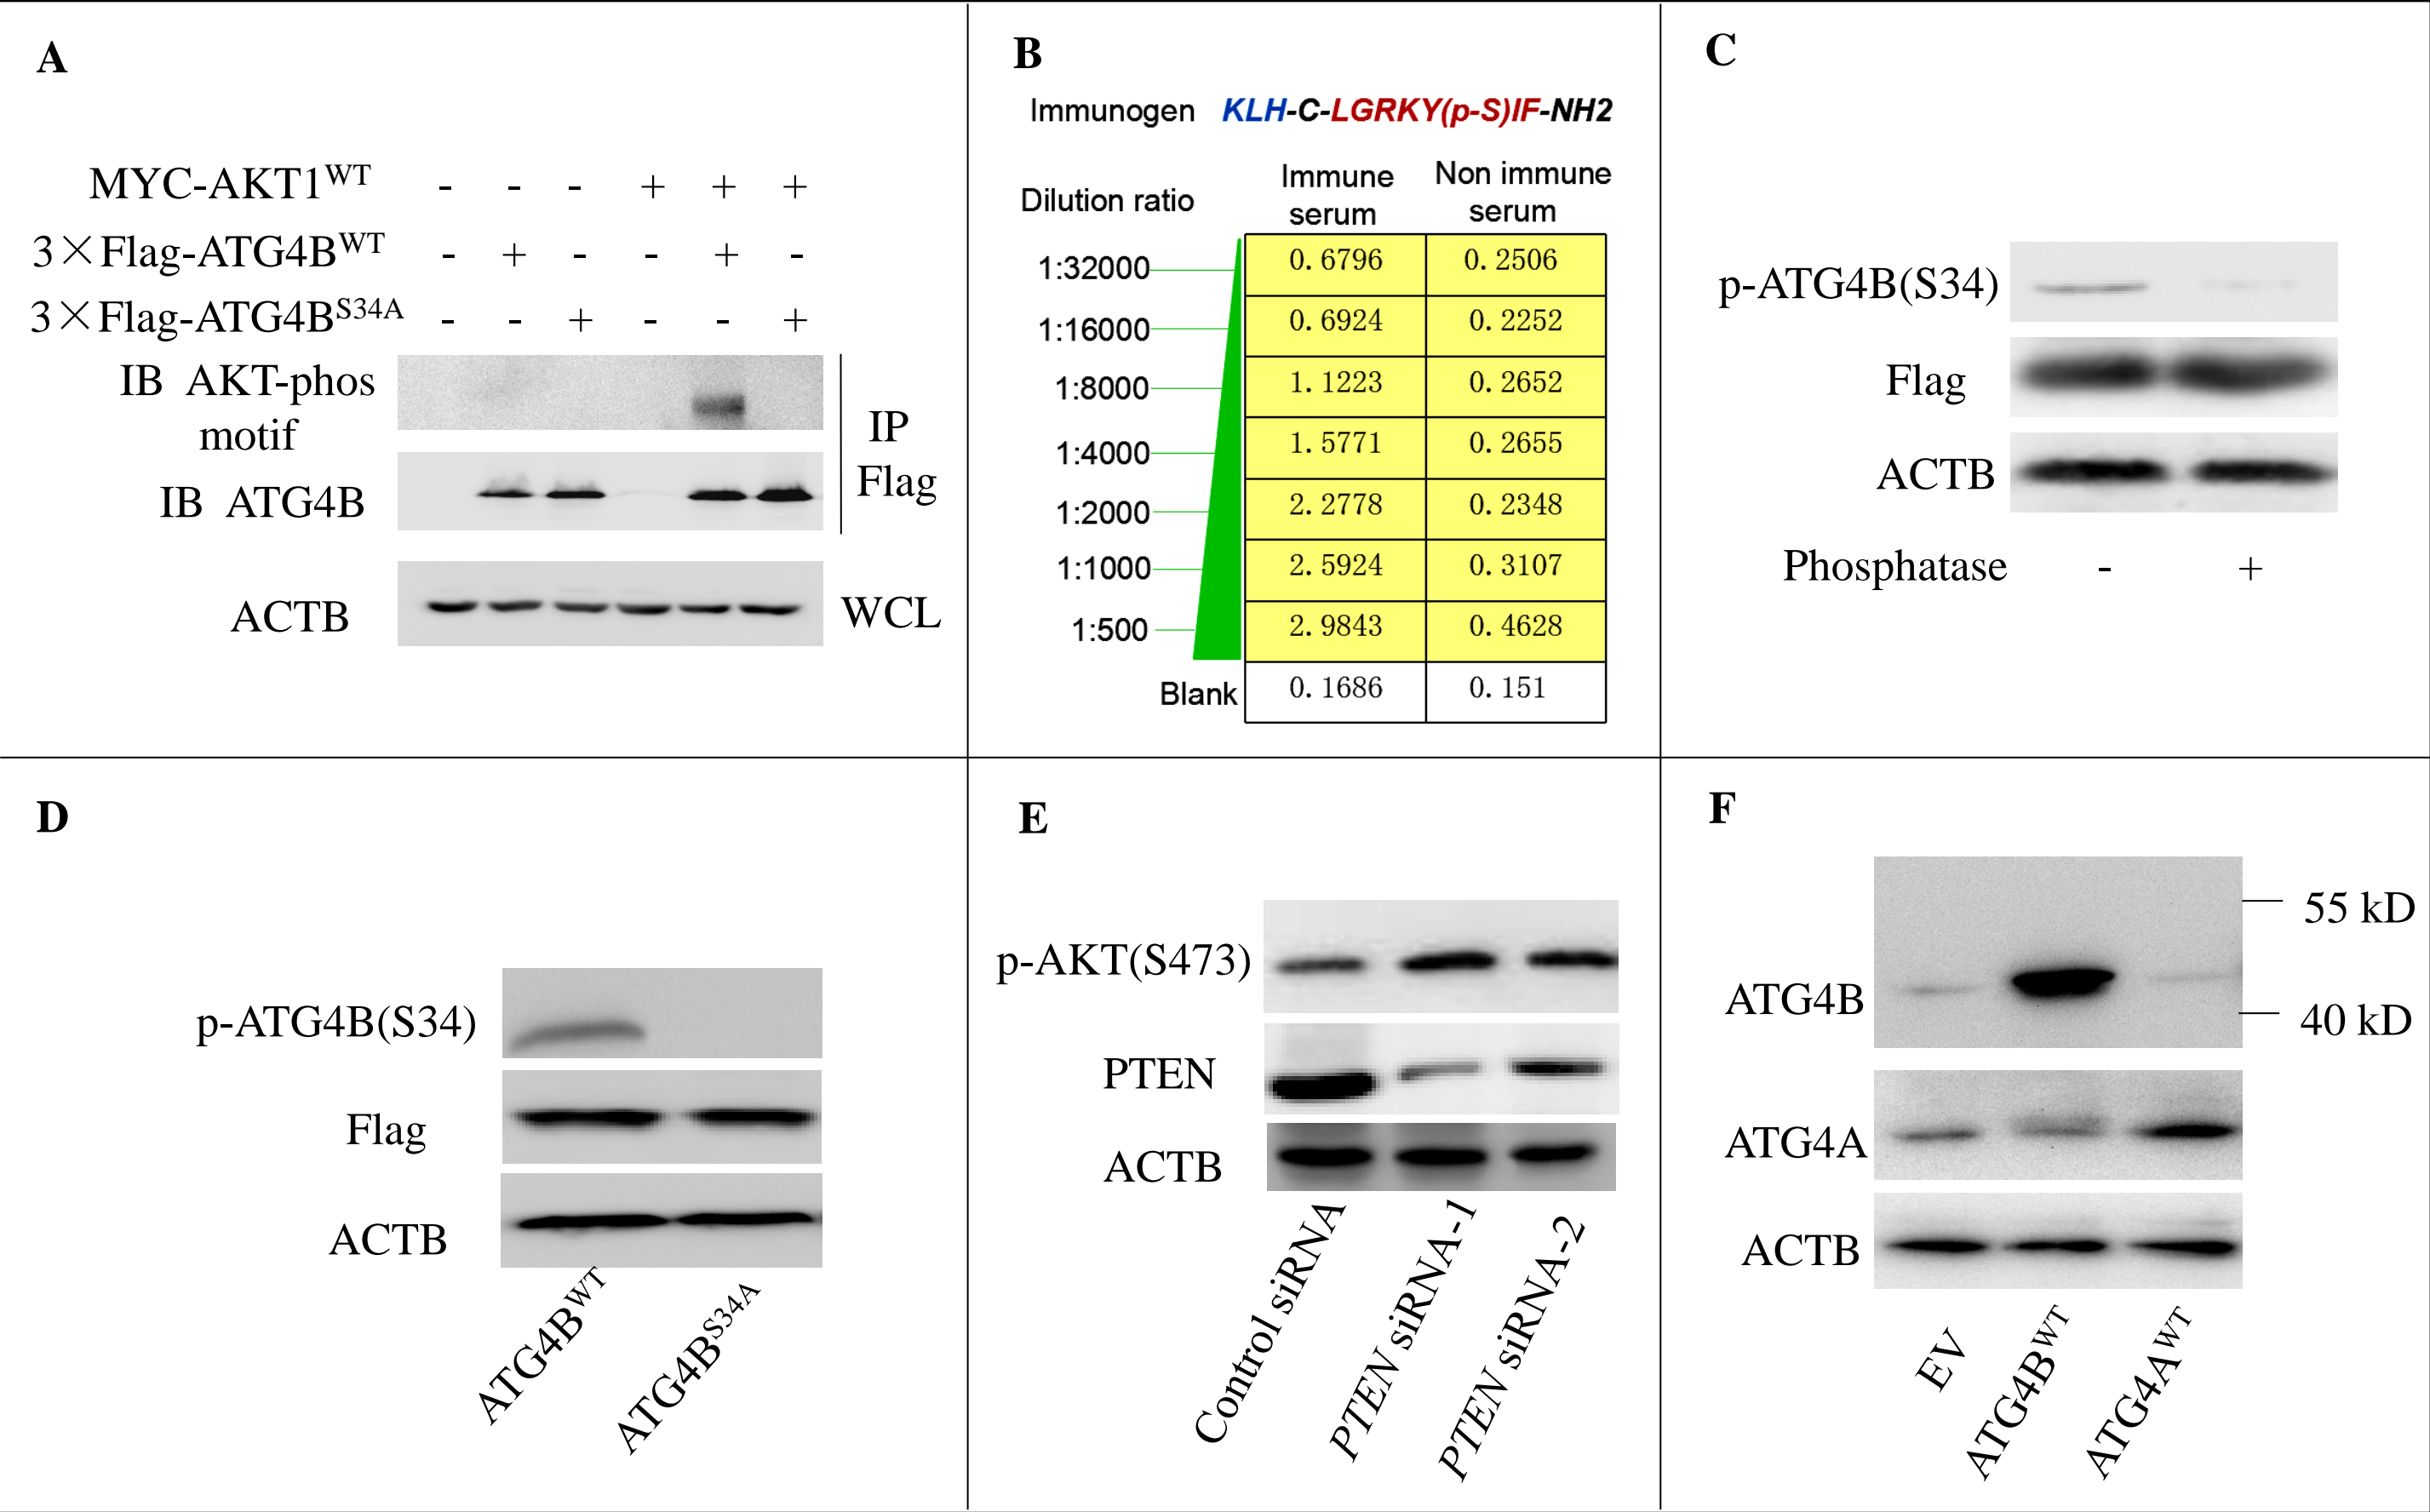

Supplement: Supplementary file 3 [file 2]

Figure S6

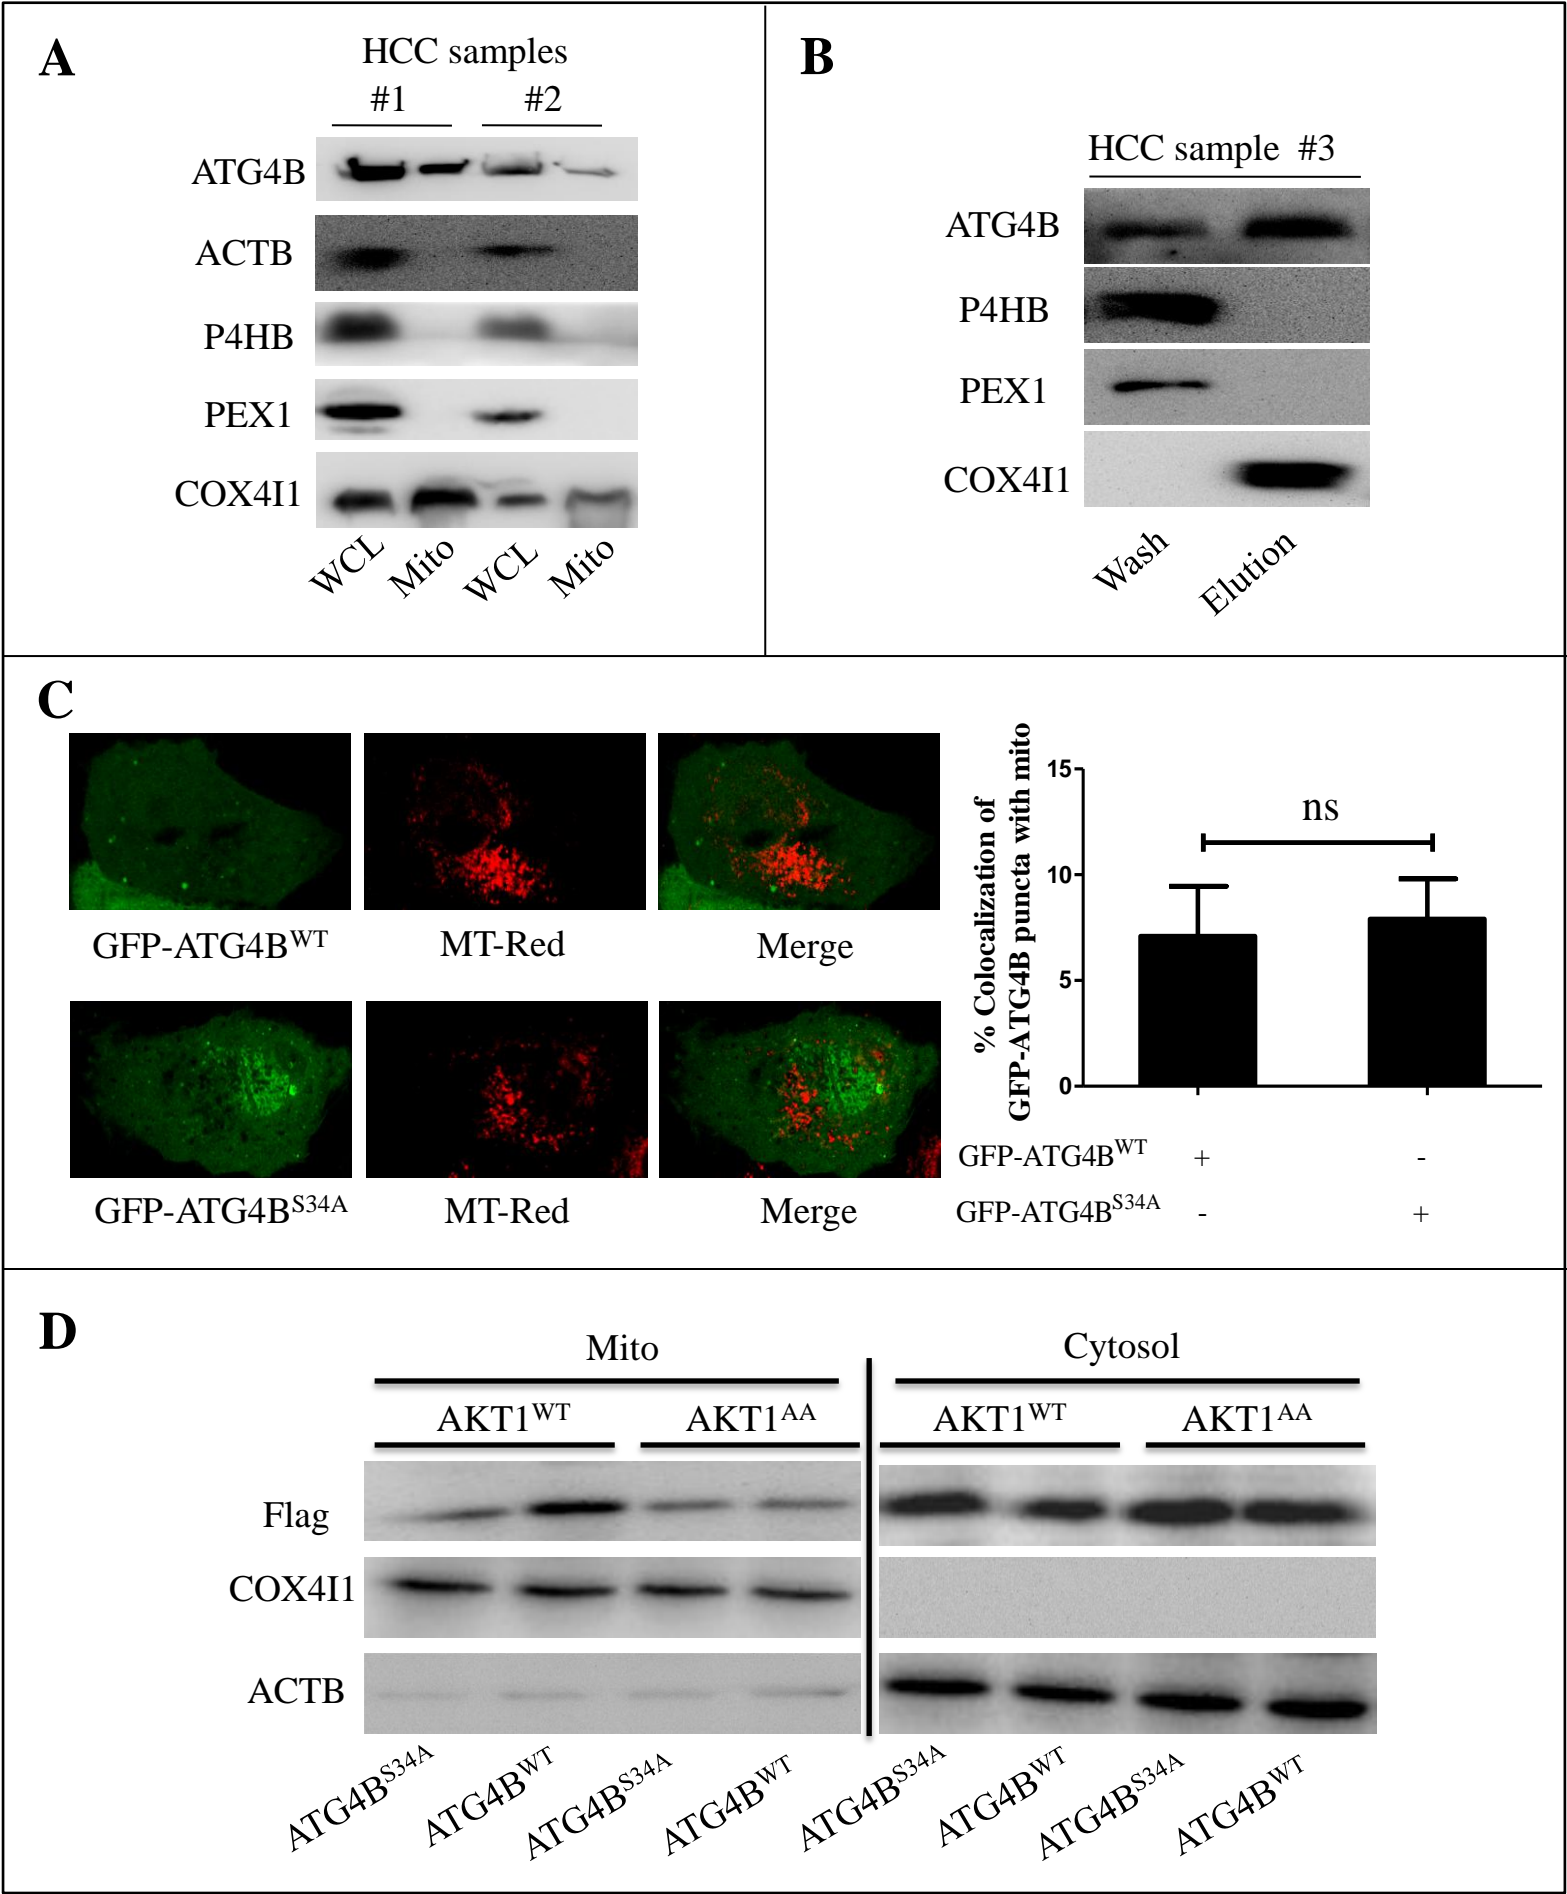

Supplement: Supplementary file 4 [file 2]

**Figure S5**

**A**

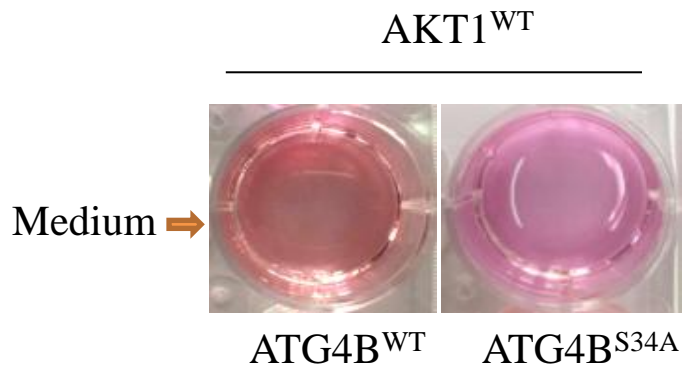

**B**

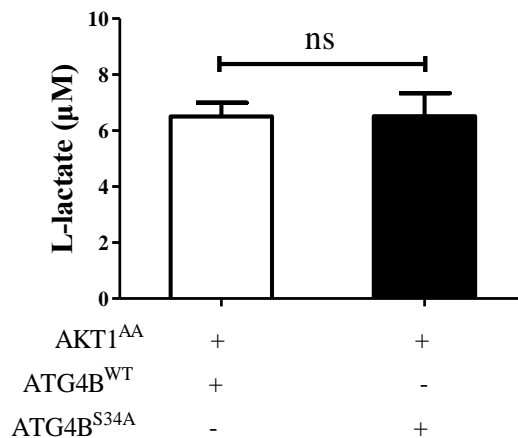

**C**

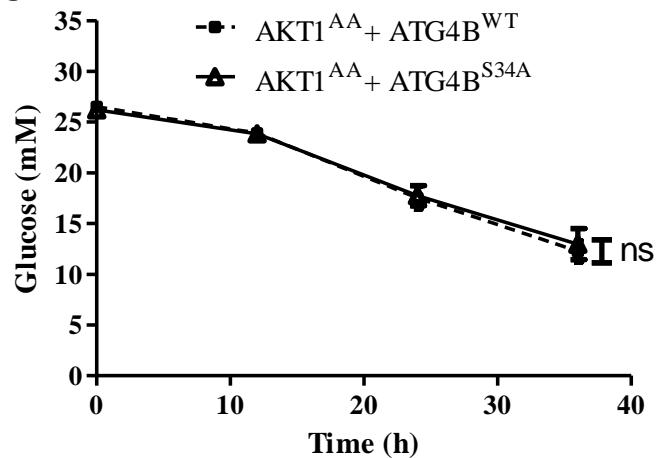

**D**

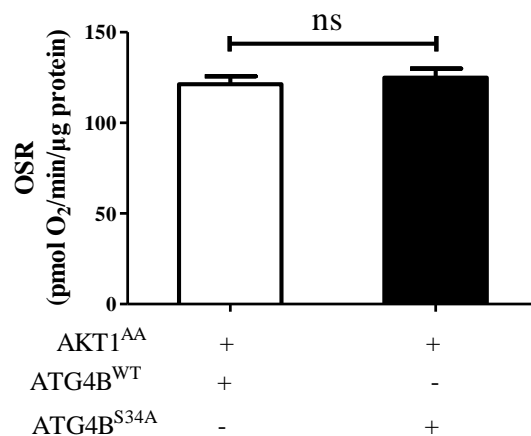

Supplement: Supplementary file 5 [file 2]

Figure S4

A

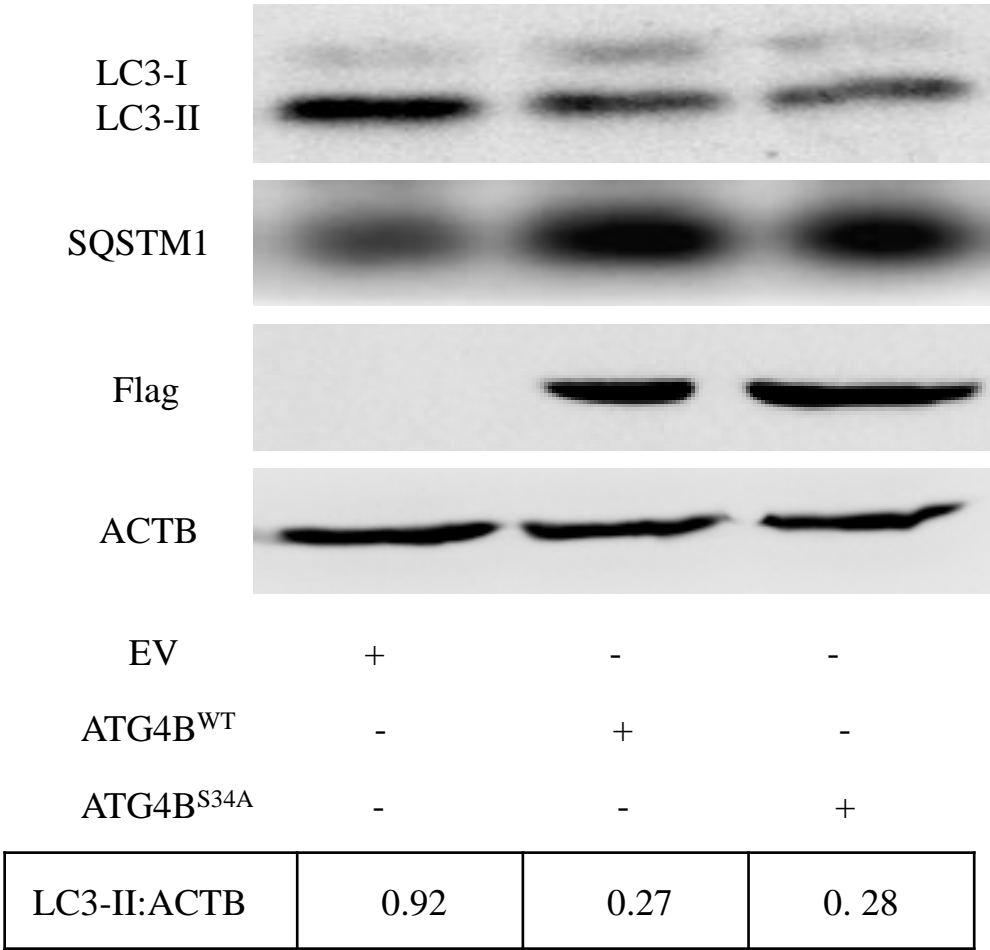

B

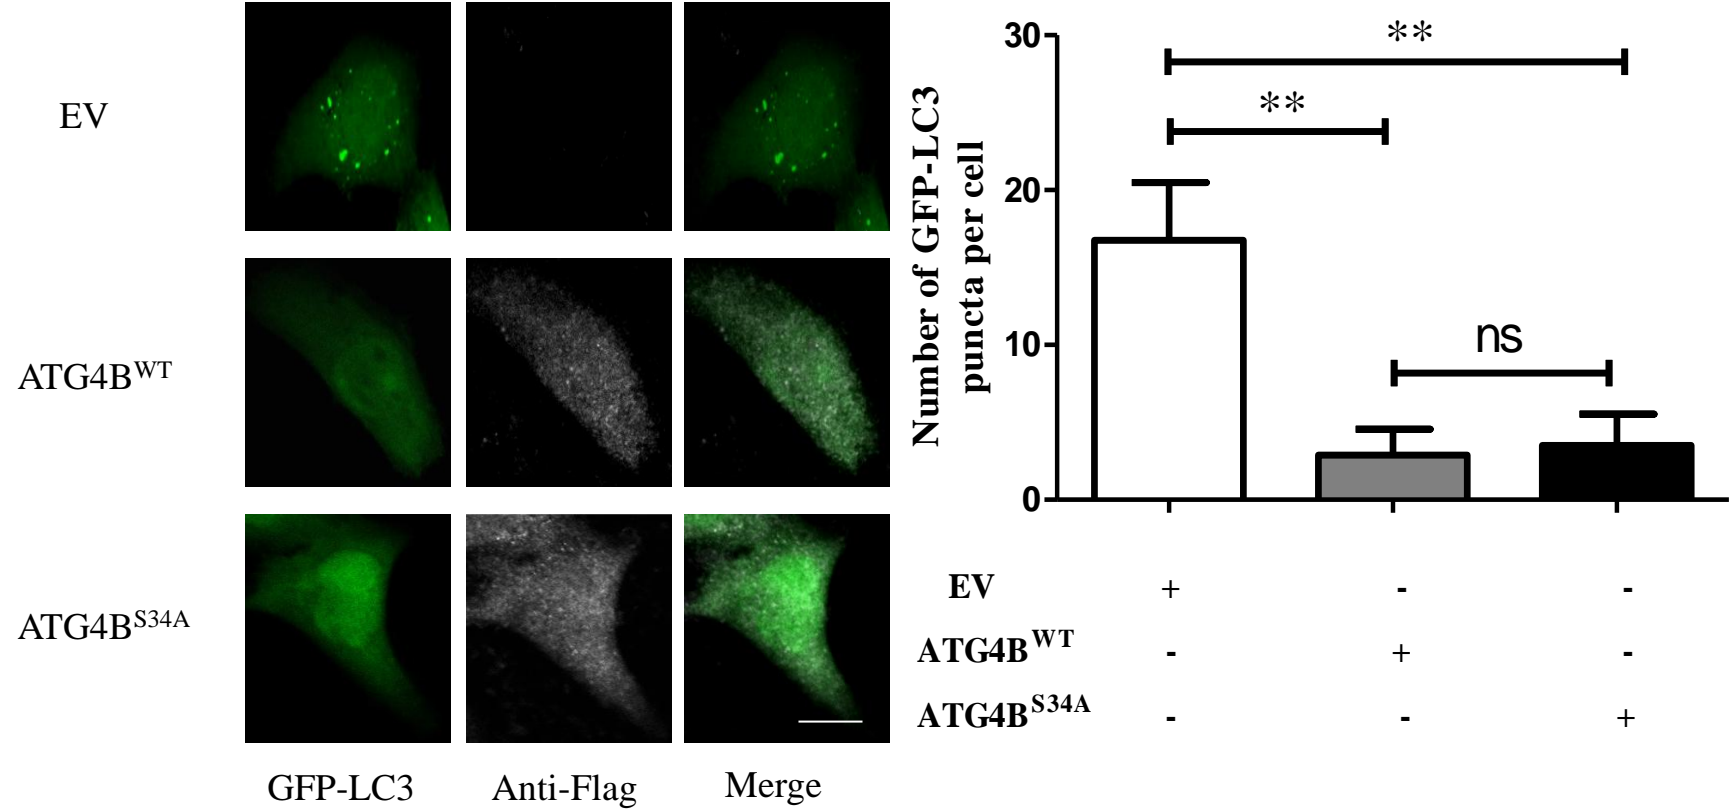

Supplement: Supplementary file 6 [file 2]

Figure S7

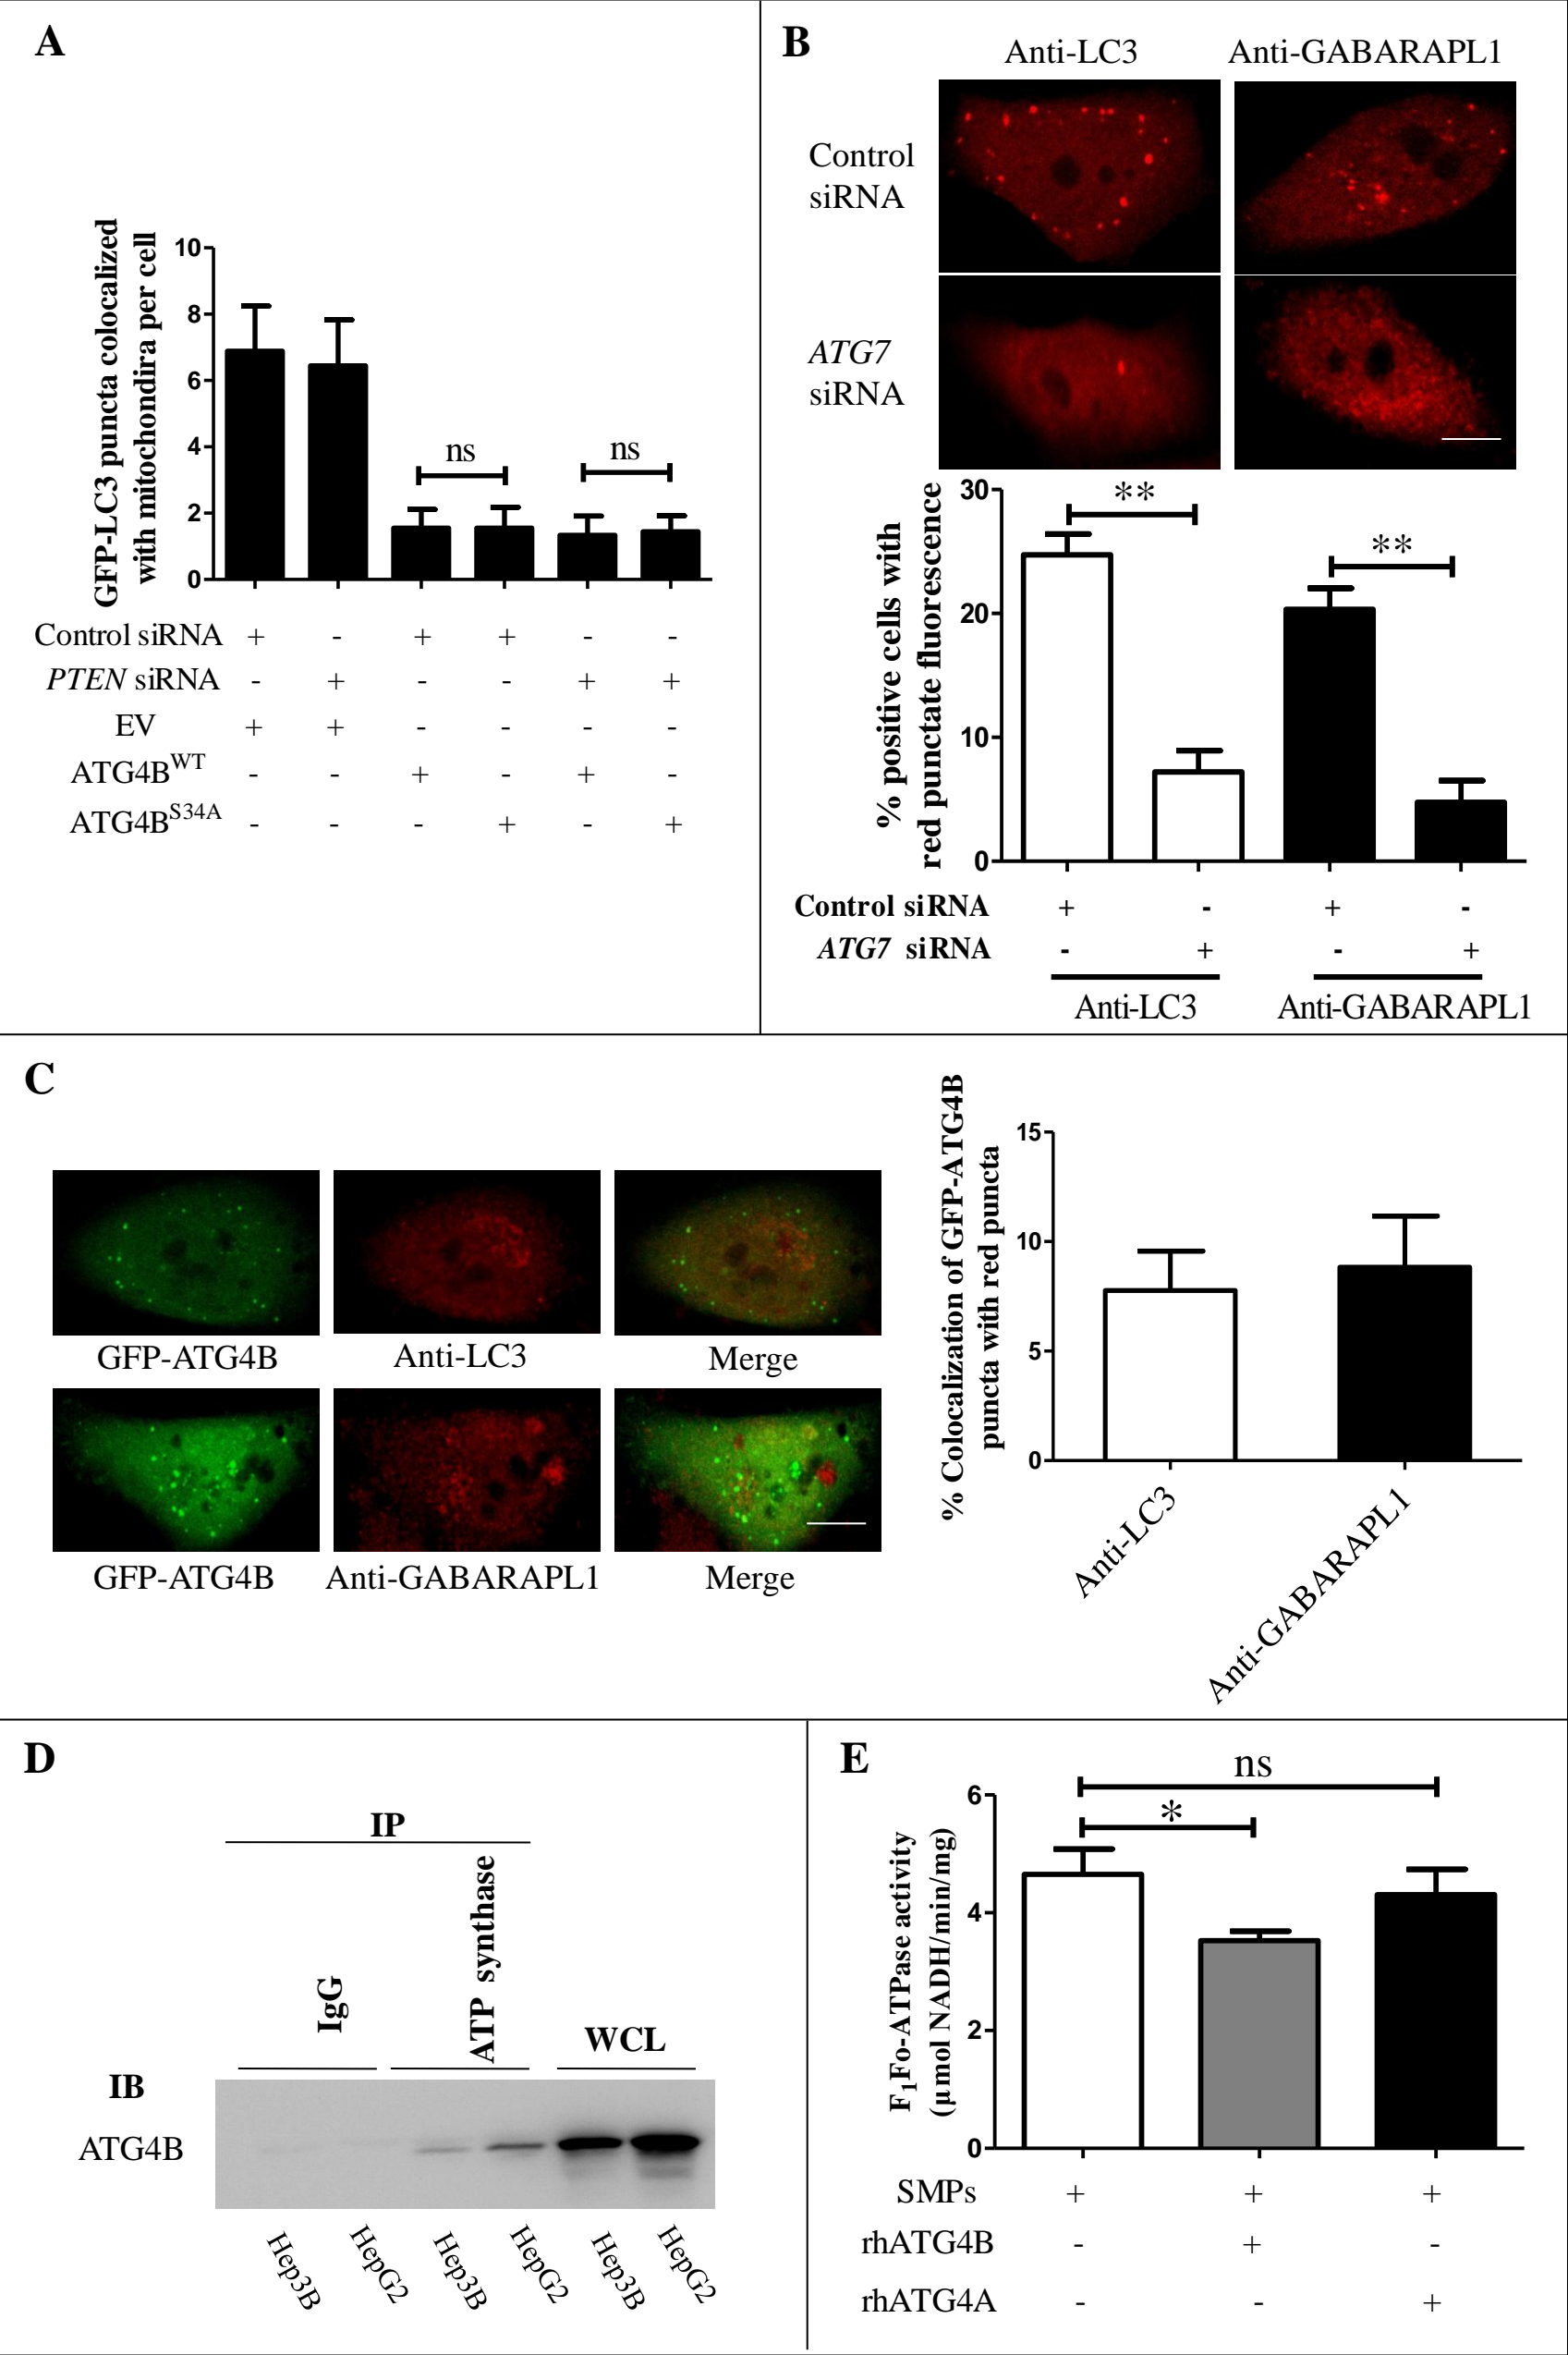

Supplement: Supplementary file 7 [file 2]
